# Supplementary material
Source: PubMed Central journal article supplement (PMC8900657)

# Supplementary Material

## Assessing Sex-Specific Circadian, Metabolic, and Cognitive Phenotypes in the A $\beta$ PP/PS1 and APP<sup>NL-F/NL-F</sup> Models of Alzheimer's Disease

**Supplementary Table 1. Animals removed from MWM analysis.** Mice were excluded from MWM analysis if a >75% improvement in learning was not observed by the 5<sup>th</sup> training session.

| <b>Group</b>                             | <b>No. of Animals Removed</b> |
|------------------------------------------|-------------------------------|
| C57BL/6J NS FEMALE 6 mo                  | 0                             |
| APP/PS1 NS FEMALE 6 mo                   | 3                             |
| APP <sup>NL-F/NL-F</sup> NS FEMALE 6 mo  | 1                             |
| C57BL/6J NS FEMALE 12 mo                 | 1                             |
| APP/PS1 NS FEMALE 12 mo                  | 2                             |
| APP <sup>NL-F/NL-F</sup> NS FEMALE 12 mo | 0                             |
| C57BL/6J NS MALE 6 mo                    | 2                             |
| APP/PS1 NS MALE 6 mo                     | 0                             |
| APP <sup>NL-F/NL-F</sup> NS MALE 6 mo    | 1                             |
| C57BL/6J NS MALE 12 mo                   | 1                             |
| APP/PS1 NS MALE 12 mo                    | 2                             |
| APP <sup>NL-F/NL-F</sup> NS MALE 12 mo   | 4                             |

**Supplementary Figure 1. MWM cognitive assessment in 12-month C57BL/6J mice.** A) Platform: CIPL was averaged across 3 independent trials per day during the 5-day training period. Probe (day 8) data was taken from a single 60s trial. B) Total time spent in the annulus 40 during the 60s probe trial. Sample Sizes for MWM are noted in the figures for time spent in the annulus 40.

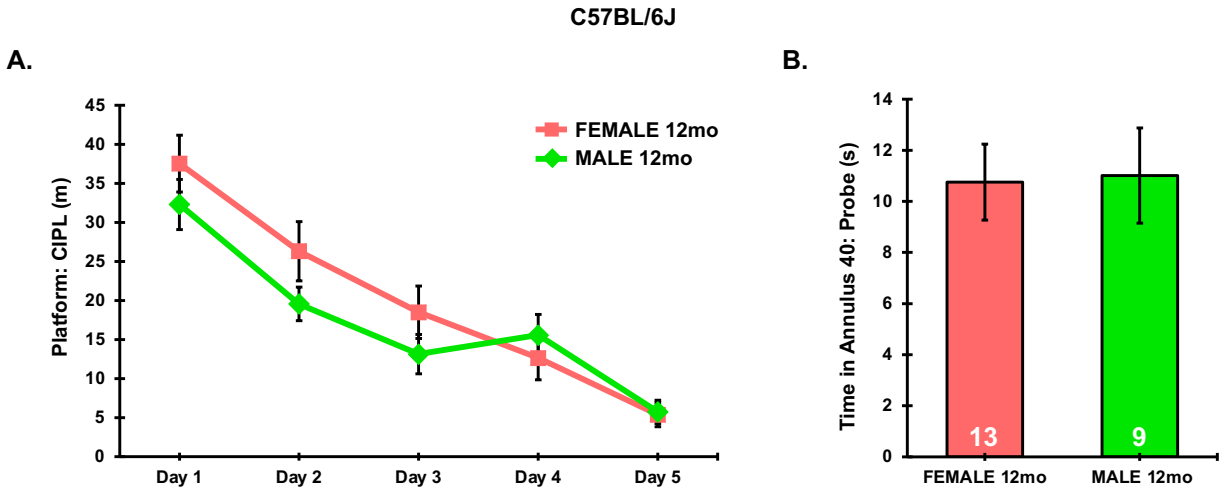

**Supplementary Figure 2. Plaque number across sex in A $\beta$ PP/PS1 mice.** A) Plaque burden in male and female (A) 6-month and (B) 12-month A $\beta$ PP/PS1 mice as measured by average plaque number across the DG, CA1 and CA3 hippocampal subregions. N= 3-4 for all groups.

**A.**

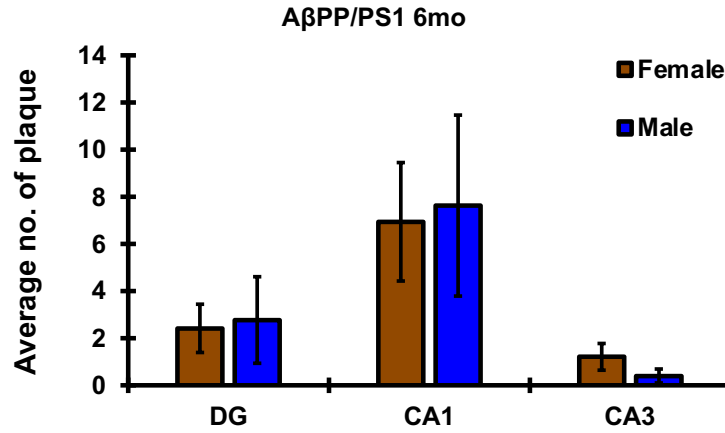

**B.**

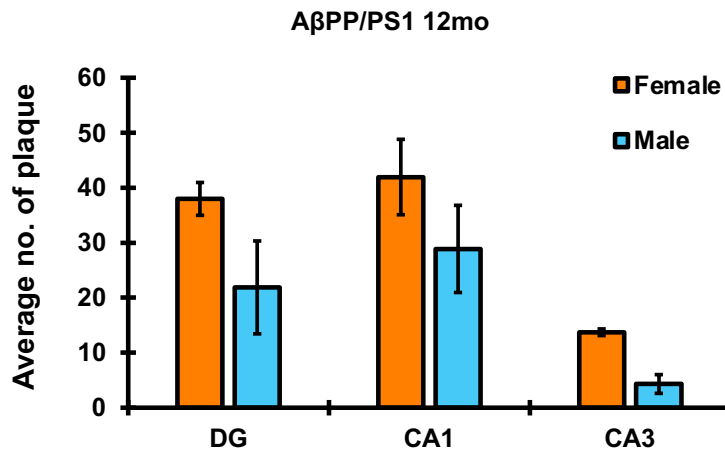

Supplement: NIHMS1781380-supplement-supplementary_material.pdf [file NIHMS1781380-supplement-supplementary_material.pdf]
